# Supplementary material
Source: HighWire-hosted journal article supplement (https://www.cmaj.ca/content/suppl/2016/07/04/cmaj.111271)
Supplement: 4.pdf [file 4.pdf]

## Pronostic de la lombalgie aiguë et persistante : méta-analyse

Luciola da C. Menezes Costa PhD, Christopher G. Maher PhD, Mark J. Hancock PhD, James H. McAuley PhD, Robert D. Herbert PhD, Leonardo O.P. Costa PhD

Pour lire la version intégrale de cet article (en anglais), consulter [www.cmaj.ca/content/184/11/E613](http://www.cmaj.ca/content/184/11/E613)

**Contexte :** Bien que la lombalgie soit extrêmement répandue, son évolution clinique reste incertaine. Notre principal objectif était de procéder à une revue systématique de la littérature sur l'évolution clinique de la douleur et de l'incapacité chez les patients qui souffrent de lombalgie aiguë et persistante. Notre deuxième objectif était de vérifier si douleur et incapacité évoluent en parallèle.

**Méthodes :** Nous avons effectué une méta-analyse de plusieurs études de cohorte de mise en route. Nous avons recensé les études admissibles en interrogeant les bases de données MEDLINE, Embase et CINAHL. Nous avons inclus des études prospectives sur des cohortes de mise en route regroupant des patients affectés par une lombalgie aiguë ou persistante, qui mesuraient la douleur, l'incapacité ou le rétablissement. Deux examinateurs indépendants en ont extrait les données et évalué la qualité méthodologique. Nous avons utilisé des modèles mixtes pour déterminer les estimations regroupées de la douleur et de l'incapacité dans le temps.

**Résultats :** L'analyse a porté sur les données provenant de 33 cohortes distinctes (11 166 participants). La moyenne pondérée des variances du score douloureux (sur un score maximum de 100) a été de 52 (IC à 95 % 48–57) au départ, de 23 (IC à 95 % 21–25) à six semaines, de 12 (IC à 95 % 9–15) à 26 semaines et de six (IC à 95 % 3–10) à 52 semaines suivant le déclenchement de la douleur pour les cohortes souffrant de douleur aiguë. Parmi les cohortes souffrant de douleur

persistante, la moyenne pondérée des variances du score douloureux (sur 100) a été de 51 (IC à 95 % 44–59) au départ, de 33 (IC à 95 % 29–38) à six semaines, de 26 (IC à 95 % 20–33) à 26 semaines et de 23 (IC à 95 % 16–30) à 52 semaines suivant le déclenchement de la douleur. L'évolution des scores d'incapacité a été similaire à celle des scores douloureux dans le temps pour les cohortes souffrant de douleur aiguë, mais les scores douloureux ont été légèrement pires que les scores d'incapacité dans les cohortes souffrant de douleur persistante.

**Interprétation :** Les patients qui souffraient de lombalgie aiguë ou persistante ont vu leur état s'améliorer nettement au cours des six premières semaines, après quoi l'amélioration a eu tendance à se stabiliser. Des scores faibles à modérés de douleur et d'incapacité s'observaient toujours à un an, surtout dans les cohortes touchées par une douleur persistante.

**Intérêts concurrents :** Christopher Maher a reçu un fonds de subvention du National Health and Medical Research Council de l'Australie pour étudier le pronostic de la dorsalgie. Il a également reçu une subvention de GlaxoSmithKline pour un essai mené à l'instigation d'un investigateur sur le paracétamol dans la lombalgie aiguë. James McAuley a reçu une bourse salariale du National Health and Medical Research Council de l'Australie et a reçu une subvention du George Institute for Global Health pour sa participation à des conférences. Aucun intérêt concurrent n'est déclaré pour Luciola Costa, Robert Herbert, Mark Hancock et Leonardo Costa.

Cet article a été revu par les pairs.

**Correspondance :** Christopher G. Maher, [cmaher@georgeinstitute.org.au](mailto:cmaher@georgeinstitute.org.au)

---

## Effet des suppléments de fer sur la fatigue chez des femmes non anémiques qui ont leurs règles et un taux de ferritine faible : essai randomisé et contrôlé

Paul Vaucher DiO MSc, Pierre-Louis Druais MD, Sophie Waldvogel MD, Bernard Favrat MD

Pour lire la version intégrale de cet article (en anglais), consulter [www.cmaj.ca/content/184/11/1247](http://www.cmaj.ca/content/184/11/1247)

**Contexte :** On ignore quels sont les bienfaits réels des suppléments de fer chez les femmes non anémiques qui ont leurs règles et qui présentent des symptômes de fatigue. Nous avons étudié les effets d'un traitement martial oral sur la fatigue et la qualité de vie, de même que sur les taux d'hémoglobine, de ferritine et de récepteurs solubles de la transferrine chez des femmes non anémiques présentant un déficit en fer et une fatigue inexpliquée.

**Méthodes :** Nous avons procédé à un essai multicentrique parallèle, randomisé et contrôlé, à double insu. Nous avons recruté les participantes à partir des cabinets de 44 médecins de premier recours en France entre mars et juillet 2006. Nous avons assigné aléatoirement 198 femmes de 18 à 53 ans qui se plaignaient de fatigue et présentaient des taux de ferritine inférieurs à 50 µg/L et d'hémoglobine supérieurs à 12,0 g/dL soit à du sulfate ferreux oral (80 mg de fer élémentaire par
